# Supplementary material
Source: PubMed Central journal article supplement (PMC8166182)
Supplement: pnas.2024716118.sapp.pdf [file pnas.2024716118.sapp.pdf]

1  
2  
3  
4  
5  
6  
7  
8  
9  
10  
11  
12  
13  
14  
15  
16  
17  
18  
19  
20  
21  
22  
23  
24  
25  
26  
27  
28  
29  
30  
31  
32  
33

# Supplementary Material for

## Non-Canonical Protein Kinase A Activation by Oligomerization of Regulatory Subunits as Revealed by Inherited Carney Complex Mutations

Naeimeh Jafari<sup>1</sup>, Jason Del Rio<sup>2</sup>, Madoka Akimoto<sup>1</sup>, Jung Ah Byun<sup>3</sup>, Stephen Boulton<sup>3</sup>, Kody Moleschi<sup>1</sup>, Yousif Al Sayyed<sup>1</sup>, Pascale Swanson<sup>3</sup>, Jinfeng Huang<sup>1</sup>, Karla Martinez Pomier<sup>1</sup>, Chi Lee, Jian Wu<sup>2</sup>, Susan S. Taylor<sup>2,4</sup>, Giuseppe Melacini<sup>1,3\*</sup>

<sup>1</sup>Department of Chemistry and Chemical Biology, McMaster University, 1280 Main St. W. Hamilton, Canada; <sup>2</sup>Department Pharmacology, University of California San Diego, La Jolla, CA 92093-0653, USA; <sup>3</sup>Department of Biochemistry and Biomedical Sciences, McMaster University, 1280 Main St. W. Hamilton, Canada; <sup>4</sup>Departments of Chemistry and Biochemistry, University of California San Diego, La Jolla, CA 92093-0653, USA

Running title: *PKA C Activation by PKA R Oligomerization*

\*To whom correspondence may be addressed. Email: [staylor@ucsd.edu](mailto:staylor@ucsd.edu) or [melacin@mcmaster.ca](mailto:melacin@mcmaster.ca)

This supplementary Materials includes:

|                  |          |
|------------------|----------|
| Text             | p. 2-4   |
| Figures S1 to S9 | p. 5-13  |
| Tables S1 to S4  | p. 15-17 |
| SI references    | p. 18-19 |

## 1 **Materials and Methods**

2  
3 *Protein Purification.* Mutants were prepared by site-directed mutagenesis. All constructs were  
4 transformed in BL21(DE3) cells and expressed in LB broth for unlabeled 1-379 bPKA R1 $\alpha$   
5 constructs, and in <sup>15</sup>N-M9 media for uniformly <sup>15</sup>N-labeled 119-379 and 96-244 bPKA R1 $\alpha$   
6 constructs. Expression and purification were implemented based on previously published  
7 protocols (1–5). Cells were grown at 37 °C up until the optical density at 600 nm reached 0.6 – 0.7  
8 and then they were induced with 0.5 mM isopropyl-1-thio- $\beta$ -D-galactopyranoside for 17 hours at  
9 18 °C. Cells were then resuspended in 20 mM MES buffer, pH 6.5 and 100 mM NaCl (buffer A)  
10 and disrupted with a protein homogenizer operating at 20 psi. The cell debris was removed through  
11 centrifugation (one hour at 14,000 rpm). After gradual fractionation with 40 % ammonium sulfate,  
12 the protein was resuspended in buffer A with 2 mM EGTA, 2 mM EDTA, and 5 mM DTT (buffer  
13 B) and incubated with a cAMP-Sepharose resin overnight at 4 °C. The resin-bound protein was  
14 washed with buffer B, buffer B with 700 mM NaCl, and buffer B at room temperature. Then PKA  
15 R1 $\alpha$  was eluted by using 25 – 40 mM cAMP or 20 mM cGMP depending of the purpose of the  
16 experiment. The cGMP eluted protein was dialysed extensively against 50 mM MOPS buffer pH  
17 7.0, 100 mM NaCl, 0.5 mM EDTA, 5 mM DTT (buffer C) prior to gel filtration. Further  
18 purification was obtained through gel filtration on a HiLoad 16/600 Superdex 200 pg column,  
19 which had been pre-equilibrated with buffer C for the 1-379 construct and with 50 mM MES  
20 buffer, pH 6.5, 100 mM NaCl, 2 mM EGTA, 2 mM EDTA, and 5 mM DTT (buffer D) for the 119-  
21 379 constructs. Purification of the 96-244 PKA R1 $\alpha$  fusion construct with a His<sub>6</sub>-small ubiquitin-  
22 related modifier (SUMO) tag was based on nickel-NTA (nitrilotriacetic acid) affinity  
23 chromatography with 50 mM MOPS buffer pH 7.0 and 100 mM NaCl. After cleavage of the His<sub>6</sub>-  
24 SUMO tag with a His<sub>6</sub>-tagged tobacco etch virus (TEV) protease, a second nickel-NTA column  
25 was utilized to remove the cleaved His<sub>6</sub>-SUMO and TEV. The apo 96-244 construct was prepared  
26 by unfolding with 8 M urea and refolding by gradual decrease of urea concentration when protein  
27 was bound to the first nickel column. Further purification of the 96-244 construct was implemented  
28 through gel filtration on a Superdex 75 column pre equilibrated with 50 mM MOPS buffer pH 7.0,  
29 100 mM NaCl, and 10 mM MgCl<sub>2</sub>. Protein concentrations were measured through the Bradford  
30 assay using bovine serum albumin as standard protein.

31  
32 *Urea Unfolding.* The assay was implemented in buffer C (50 mM MOPS buffer pH 7.0, 100 mM  
33 NaCl, 0.5 mM EDTA, 5 mM DTT) with 5  $\mu$ M of the PKA R1 $\alpha$  1-379 or 96-244 construct and  
34 with or without 100-fold excess of cAMP. The protein samples were incubated for three hours at  
35 room temperature with urea concentrations increasing from 0 to 8 M. Upon excitation at 293 nm,  
36 tryptophan emission was checked at 305-450 nm using a BioTek Cytation5 microplate reader.  
37 Unfolding was tracked by the ratio of fluorescence intensity at 353 nm / 340 nm and the fraction  
38 of unfolded protein as  $X_U = (R - R_N) / (R_U - R_N)$ , where R is the observed intensity's ratio at each urea  
39 concentration, and R<sub>N</sub> is the R value of the folded protein in the absence of urea, and R<sub>U</sub> is the R  
40 value at 8 M urea concentration. The unfolding assays were performed in triplicate. Errors were  
41 estimated based on standard deviations between triplicates or at plateau.

42  
43 *NMR Experiments.* All NMR experiments were implemented on Bruker AV700 spectrometer. 1D  
44 <sup>1</sup>H NMR spectra for 8  $\mu$ M R1 $\alpha$  (1-379) were acquired at 298K in 20 mM phosphate buffer pH 7.4,  
45 50 mM NaCl, 100 % D<sub>2</sub>O in the presence of 80  $\mu$ M excess cAMP with a spectral width of 16.23  
46 ppm and 16K points. The repetition delay was 1 s. The number of scans was 512. Spectra were

1 processed with a line broadening of 3.0 Hz. After 90 minutes of incubation at 60 °C (referred to  
2 here as mild heat treatment), 1D <sup>1</sup>H NMR spectra were reacquired. In Figure 4B, the methyl peak  
3 intensity of wt and A211T prior to mild heat treatment were normalized to the methyl intensity of  
4 A211D prior to mild heat treatment. The same normalization scaling constant was applied to the  
5 intensity of the mildly-heat-treated samples as well. Unless otherwise specified, the <sup>1</sup>H,<sup>15</sup>N-HSQC  
6 spectra of 100-200 μM R1α (119-379) were acquired in buffer D (50 mM MES buffer, pH 6.5,  
7 100 mM NaCl, 2 mM EGTA, 2 mM EDTA, and 5 mM DTT) with 10 % D<sub>2</sub>O and 0.7-1.2 mM  
8 excess cAMP at 306 K using 1024 and 128 complex t<sub>2</sub> and t<sub>1</sub> points, respectively, 8 scans and a  
9 1.0 s recycle delay. The H/D exchange samples were prepared based on previously published  
10 protocols and spectra were analysed based on previous assignments (2). The H/D exchange buffer  
11 was the same as the HSQC buffer, but was prepared in 99% D<sub>2</sub>O and 0.7 mM cAMP. The R1α  
12 (119-379) concentrations for the H/D exchange experiments were in the 140-260 μM range. The  
13 dead time for H/D exchange experiments was ~25 ± 5 minutes. The presence of excess cAMP and  
14 protein was monitored by 1D <sup>1</sup>H NMR spectra interleaved between the acquisition of the HSQC  
15 spectra for monitoring H/D exchange.

16  
17 *ThT and ANS Fluorescence, DLS, and TEM Data Acquisition.* All the fluorescence data were  
18 acquired using a BioTek Cytation5 plate reader. For these experiments we prepared 8 μM R1α (1-  
19 379) with ten-fold excess cAMP in buffer C with either 50 μM Thioflavin (ThT) or 200 μM 1-  
20 Anilino-8-Napthalene Sulfonate (ANS). The ANS fluorescence spectra were first recorded at  
21 298K with excitation at 350 nm and emission range of 400-600 nm. Samples were then heated to  
22 60 °C and the ThT fluorescence was monitored with excitation at 440 nm and emission at 482 nm  
23 every five minutes for a total of 14 hours. After 14 hours of incubation at 60 °C (referred to here  
24 as heat treatment), the ANS fluorescence spectra were re-acquired and the initial ANS fluorescence  
25 spectra subtracted. Triplicates spectra were acquired for each A211 mutant. For the G287 mutants,  
26 the error for the ThT fluorescence was assessed as the standard deviation of ten data points  
27 recorded at the end of the 13 hours and 20 minutes incubation period at 60 °C, while the error for  
28 the ANS fluorescence was computed as the standard error of two replicates. DLS data were  
29 acquired using the same sample utilized for the ThT experiments after 1:2 dilution with buffer C.  
30 Prior to DLS measurements, samples were centrifuged at 13,000 rpm for ten minutes. A Malvern  
31 ZEN3600 – Zetasizer Nano ZS with 1.5 mL cuvettes and a 1 cm pathway was used for DLS data  
32 acquisition at 298K. The DLS profiles are the average of three technical replicates. The samples  
33 for the TEM images were prepared according to the same protocol used for the ThT experiments  
34 followed by 3:16 dilution with ultrapure water. 5 μL aliquots were loaded on carbon coated grids  
35 and after two minutes of incubation, the grids were washed with 100 μL ultrapure water and  
36 negatively stained with 1 % uranyl acetate for one minute. The TEM images were acquired at 80  
37 kV on a JEOL 1200EX TEMSCAN. Negative control samples for DLS and TEM were not subject  
38 to heat treatment, but incubated at 4 °C and contained 8 μM R1α (1-379) wt or mutant proteins  
39 with tenfold excess cAMP.

40  
41 *PKA Inhibition Assay.* The activation of bovine heart C-subunit PKA (Sigma-Aldrich P2645) was  
42 measured through the Kinase-Glo luminescent assay (Promega). After 30-minute incubation at  
43 room temperature of 4 nM C-subunit in the presence of 0-60 nM R1α (1-379), we added 10 μM  
44 ATP and 5 μM Kemptide. The final volume of the reaction mixture was 50 μL. The reaction was  
45 quenched after an hour incubation at room temperature by the addition of 50 μL of Ultra-Glo  
46 Luciferase reagent (Promega). After ten minutes at room temperature, the luminescence was

1 recorded by a BioTek Cytation5 microplate reader. The buffer assay was Tris:HCl 40 mM pH 7.5,  
2 BSA 0.1 mg/ml, and MgCl<sub>2</sub> 20 mM and three biological replicates were acquired. Errors were  
3 estimated based on standard deviations among triplicate measurements. The R1 $\alpha$  proteins were  
4 prepared by eluting with cGMP as described in the Supplementary Text. Unless otherwise  
5 specified, samples with oligomerized R1 $\alpha$  were prepared by incubating at 37 °C for 2-8 hours 1  
6  $\mu$ M of natively folded R1 $\alpha$ . Control samples from the same solution of 1  $\mu$ M natively folded R1 $\alpha$   
7 were stored at 4 °C for 2-8 hours. Percentage inhibition was calculated relative to wt R1 $\alpha$  kept at  
8 4 °C for two hours. Concentrations after incubation were monitored by a NanoDrop™ One/One<sup>C</sup>  
9 Microvolume UV-Vis Spectrophotometer.

10  
11 *Protein Crystallization and Data Collection.* Purified PKA R1 $\alpha$  (1-379) A211D Carney Complex  
12 mutant was concentrated in 30 kDa MWCO Amicon filters (Millipore; Burlington, MA) to 8  
13 mg/mL. The protein was crystallized in 2  $\mu$ L hanging drops using the vapor diffusion method with  
14 75 mM Sodium Acetate (pH 5.0), 2.0 M sodium formate, and four-fold molar excess cAMP at  
15 22.5 °C. Tetragonal crystals formed in approximately two weeks and were transferred to a  
16 cryoprotectant solution comprised of the mother liquor supplemented with 40% glycerol prior to  
17 flash freezing in liquid nitrogen. Further details about molecular replacement and structure  
18 refinement are available in the Supplementary Information.

19  
20 *Molecular Replacement and Structure Refinement.* X-ray diffraction data were collected at the  
21 Advanced Light Source 822 beamline (Berkeley, CA) and scaled in a R3 space group (a=b=176.8  
22 Å, c= 345.5 Å) using HKL2000 (6). Initial phasing of the R1 $\alpha$  A211D dimer was generated by  
23 molecular replacement, using the monomeric R1 $\alpha$ <sub>91-379</sub> (PDB ID: 1RGS) as a search model probe  
24 in Phaser (7, 8). Phaser models were improved by solvent flattening using Density Modification  
25 (DM)(9). Model building was performed in Coot, using the crystallography and NMR systems  
26 (CNS) coupled with re mac noncrystallographic symmetry restraints and followed by multiple  
27 rounds of refinement using Phenix.(10–13) Implementing TLS refinement for each chain  
28 converged to R and R<sub>free</sub> values of 0.221 and 0.269, respectively (Table S2)(14). The final model  
29 was comprised of four individual dimers each containing residues 109–376, and verified with  
30 PROCHECK for excellent geometry(15). In contrast to wild type, which crystallized as a single  
31 dimer in a tetragonal P4<sub>1</sub>2<sub>1</sub>2 space group, the A211D mutant packed in a trigonal R3 space group  
32 comprised of four individual dimers (I-IV; Table S2; Figure S5A). All figures, SASA and RMSD  
33 values were prepared or calculated using PyMOL Molecular Graphics System, Version 2.4.0  
34 (Schrödinger, LLC; San Diego, CA) or PISA (16).

35  
36 *Trypsin digestion.* Full length WT PKA R1 $\alpha$  (no excess cAMP) and A211D mutant (no excess  
37 cAMP) at 15  $\mu$ g/50  $\mu$ L were incubated with trypsin 0.0125 % for 1h at 37 °C. Buffer C (50 mM  
38 MOPS buffer pH 7.0, 100 mM NaCl, 0.5 mM EDTA, 5 mM DTT) was used to dilute the samples.  
39 After centrifugation, the samples were analyzed with SDS-page and CBB stain.

# 1 Figure S1

2

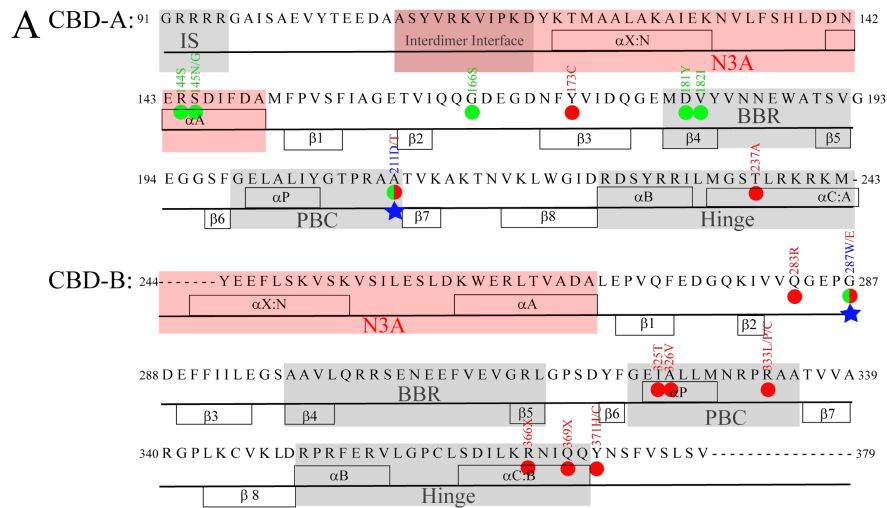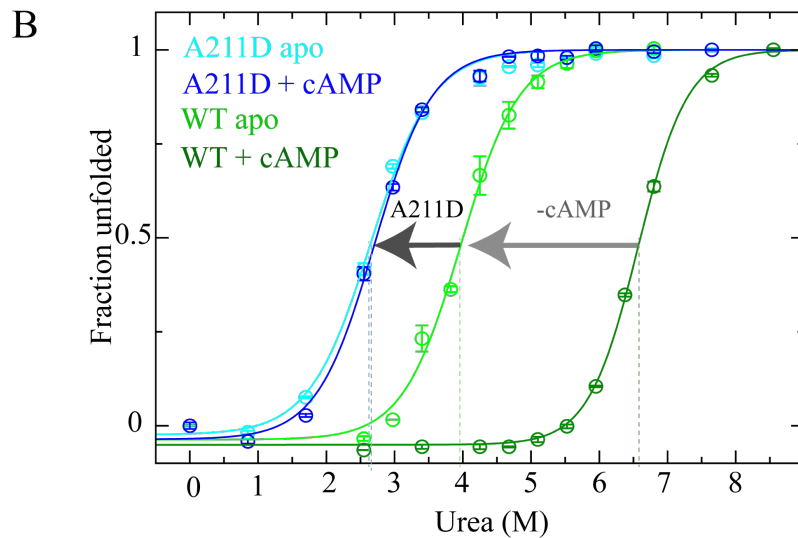

3

4

5 **Figure S1:** (A) Sequence and secondary structure of the tandem cAMP-binding domains (CBDs).  
 6 Red/gray areas are binding or allosteric hot spots. IS is the inhibitory site, PBC the phosphate  
 7 binding cassette, BBR the base binding region. The blue stars denote the double CNC/ACRDYS1  
 8 mutant sites Ala 211 and Gly 287. Other non haplo-insufficient CNC and ACRO mutants are  
 9 indicated in green and red, respectively. (B) *Effect of the A211D Mutation on the Stability of PKA*  
 10 *R1 $\alpha$  CBD-A.* Urea unfolding profiles of 5  $\mu$ M wt and A211D PKA R1 $\alpha$  (96-244) spanning CBD-  
 11 A in the absence and presence of 100-fold excess cAMP. The color code is shown in the figure.  
 12 The vertical dashed lines indicate the urea concentrations needed for half-maximal unfolding ( $C_m$ ).  
 13 Data acquired in triplicate and error is SD.

14

15

1  
2 **Figure S2**

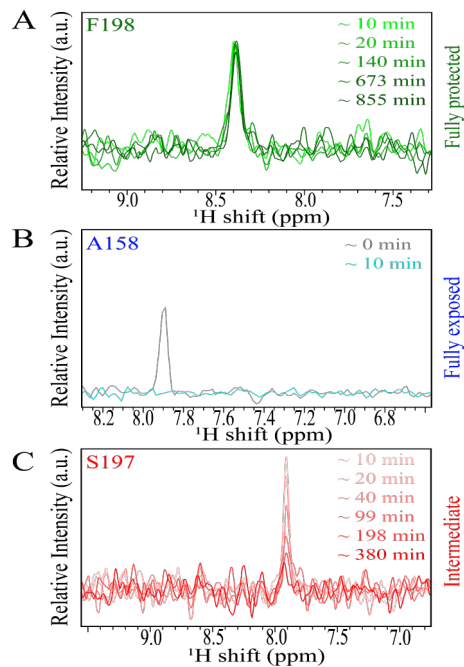

3  
4  
5 **Figure S2:** 1D cross-sections from peaks in HSQC spectra acquired during the hydrogen-  
6 deuterium exchange (HDX) experiments for the wt and the A211 mutants of PKA R1 $\alpha$  (119-379).  
7 The panels illustrate representative cases of residues that are fully protected (A) (*e.g.* F198 in wt),  
8 fully exposed (B) (*e.g.* A158 in A211D) or subject to intermediate exchange (C) (*e.g.* S197 of  
9 A211T). Fully protected residues are defined as those that do not appreciably exchange during the  
10 course of the H/D experiments (~14 hours). Fully exposed residues are defined as those for which  
11 H/D exchange is complete within the second HSQC acquisition after the dead time of the  
12 experiment. Intermediate exchange applies to the residues falling between the fully exposed and  
13 fully protected cases. In (B), the first 1D cross-section (gray) is from a control HSQC acquired  
14 using the H<sub>2</sub>O buffer. In the other panels, lighter shades correspond to 1D cross-section from  
15 HSQC spectra recorded at earlier times, while darker shades represent later time points.

# 1 Figure S3

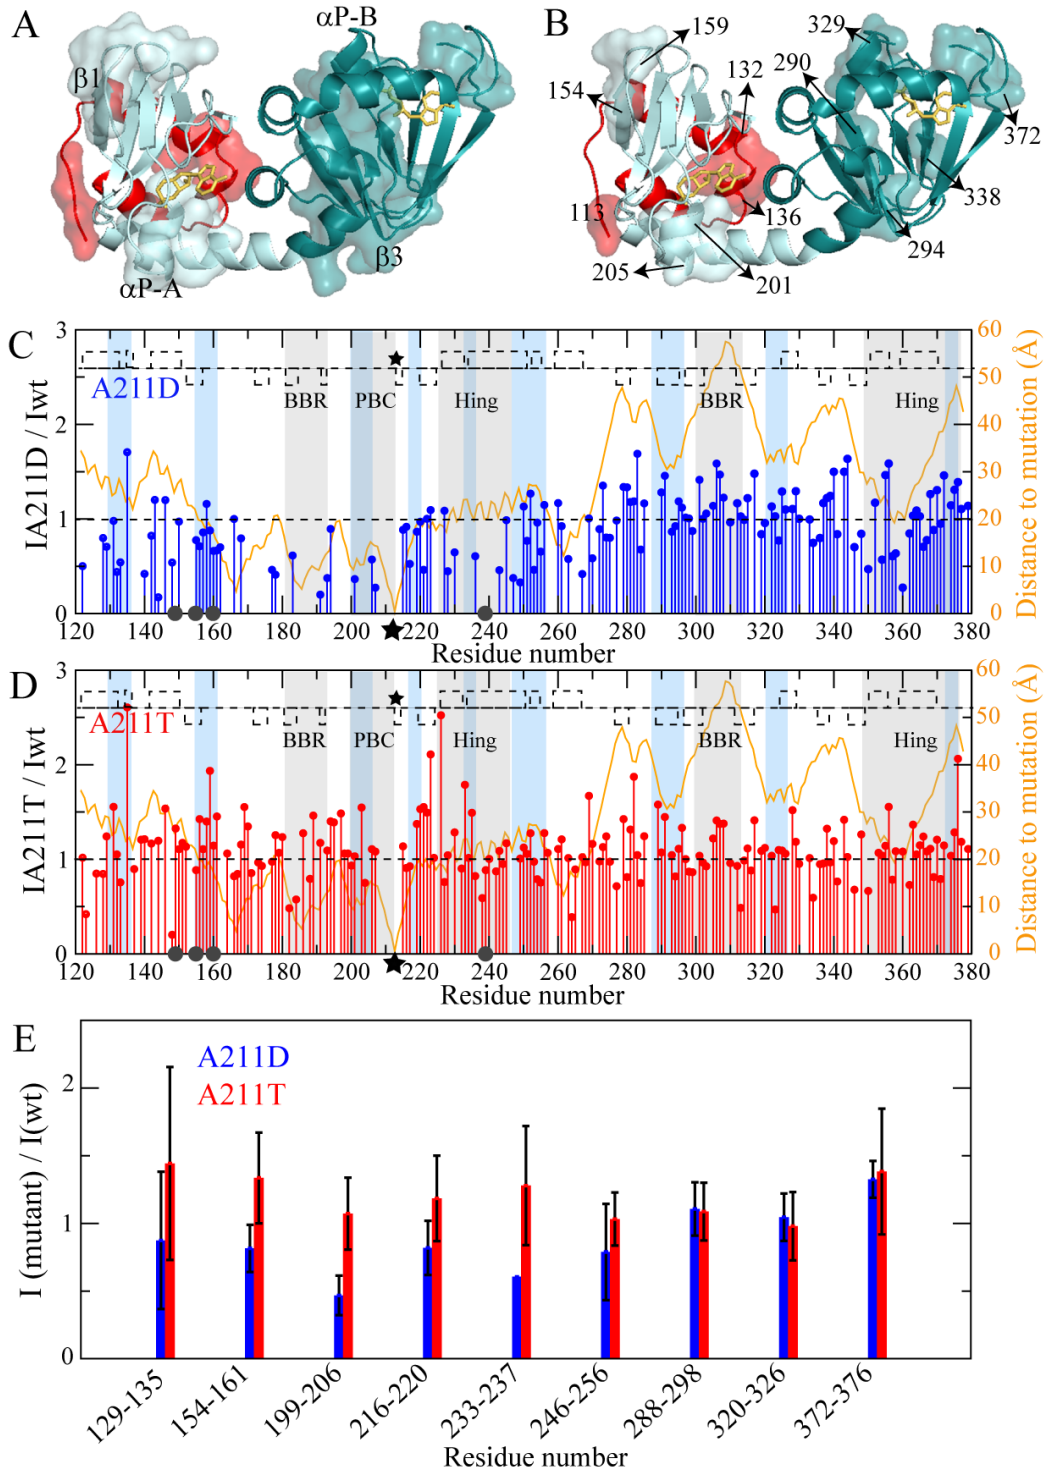

2  
3

4 **Figure S3:** (A) Aggregation prone sites of wt PKA R1 $\alpha$  based on AGGRESCAN (17) and (B)  
5 *AmylPred* (18) predictions mapped on the surface of the 1RGS structure, in which N3A-A and the

1 preceding linker are highlighted in red and the rest of CBD-A is light teal, while CBD-B is in dark  
2 teal. cAMP is shown as yellow sticks. Amylpred reports a consensus map among multiple amyloid  
3 propensity prediction algorithms, including not only AGGRESCAN but also Amyloidogenic  
4 Pattern, Average Packing Density, Beta-strand contiguity, Hexapeptide Conf. Energy, Pafig,  
5 SecStr and TANGO. The AmylPred consensus sites are: 34 (not shown), 112-114, 132-137, 154-  
6 159, 201-205, 290-294, 325-329, 337-338 and 372-376. Panel A here shows surfaces similar to  
7 those shown in Fig. 2 and Fig. S6 albeit with a different color code and it is included here for the  
8 convenience of comparison with panel B. (C, D) *Residue-specific intensity changes of A211*  
9 *mutants relative to wt PKA RI $\alpha$  (119-379) in the presence of 0.7 mM excess cAMP.* Black stars  
10 indicate sites of mutation, while the orange line is the distance from the mutated residue. Gray  
11 areas highlight allosteric and/or binding hot spots, while the blue areas denote aggregation-prone  
12 sites detected by AGGRESCAN. Significantly overlapped residues are removed from these plots.  
13 The black circles highlight residues involved in inter-dimer interfaces (Table 1). (E)  
14 *Average intensity changes in aggregation prone regions.* The error is the standard deviation of the  
15 intensities of all detectable non-overlapped residues in a given region, but for region 233-237 of  
16 A211D (marked by \*) for which only a single residue was available. The AGGRESCAN  
17 aggregation regions were utilized for this panel.  
18  
19  
20



# Figure S4

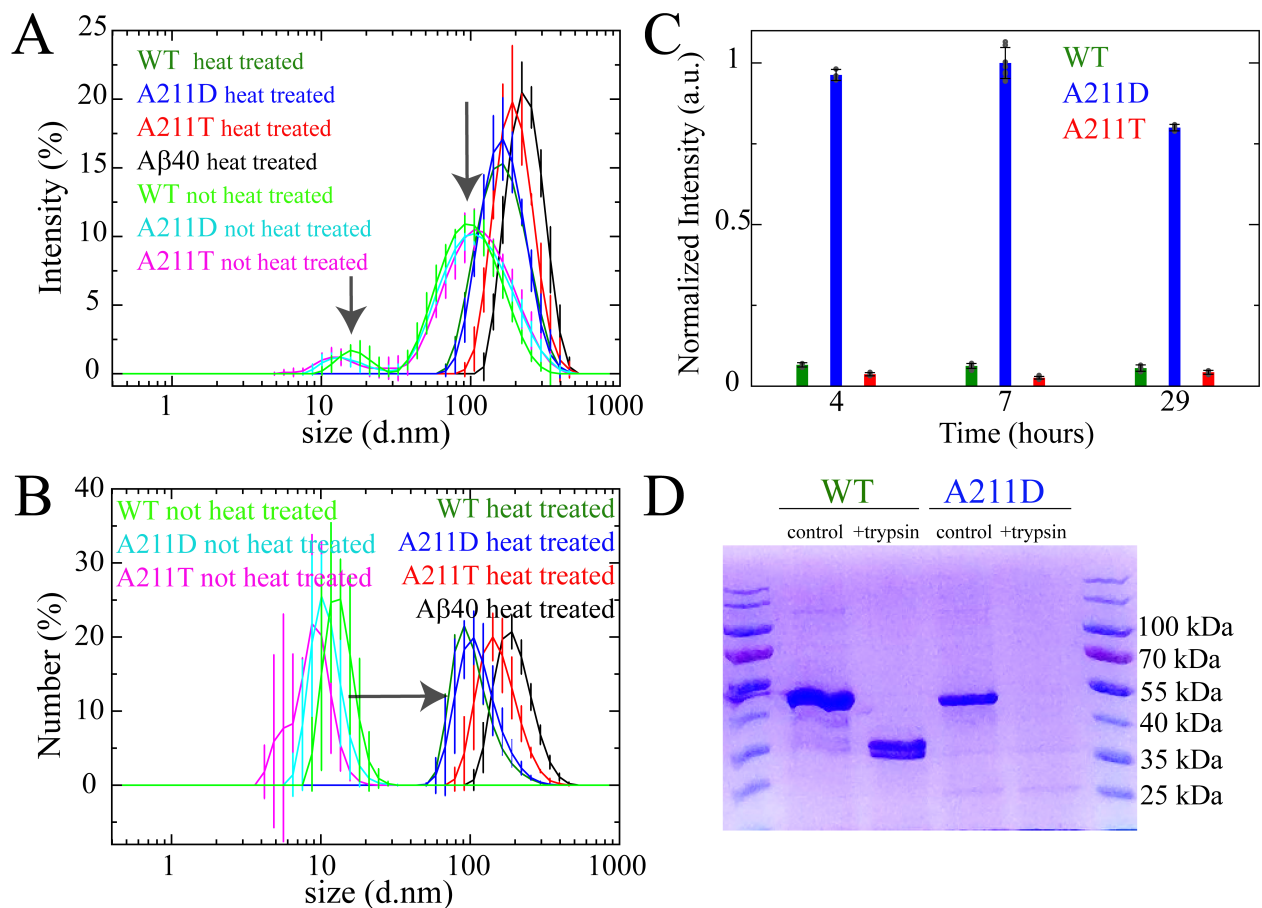

**Figure S4:** *Dynamic Light Scattering (DLS) Profiles of wt, A211D and A211T PKA R1 $\alpha$  Before and After Heat Treatment.* (A) Intensity plot for PKA R1 $\alpha$  (8  $\mu$ M, ten-fold cAMP excess). The negative control samples with no heat treatment exhibit two peaks above 10 nm and at 100 nm. However, after heat-treatment, a single peak is observed corresponding to an average size above 100 nm but slightly below the A $\beta$ (1-40) oligomer size, which serves as a positive control. (B) Relative number plot for PKA R1 $\alpha$  (8  $\mu$ M, ten-fold cAMP excess), showing that most particles in the control samples exhibit a size just above 10 nm. Color codes are shown in the panels. Data acquired in triplicate and error is SD. (C) *PKA R1 $\alpha$  Self-Association into Cross  $\beta$ -Sheet Assemblies at 37  $^{\circ}$ C.* Cross  $\beta$ -sheet formation as reported by ThT binding to 8  $\mu$ M R1 $\alpha$  (1-379) with 10  $\mu$ M excess cAMP incubated at 37  $^{\circ}$ C while shaking. The ThT intensity at 482 nm (normalized to the A211D intensity at 7 hours) is higher for the A211D mutant than the wt and A211T mutant. (D) *Differential proteolytic digestion in WT vs. A211D PKA R1 $\alpha$ .* Upon an hour incubation at 37  $^{\circ}$ C, the MW of control samples with no trypsin remains at  $\sim$ 43 kDa, while the samples with trypsin show proteolytic degradation. Proteolysis is more limited in the WT than in the A211D sample.

# 1 Figure S5

2

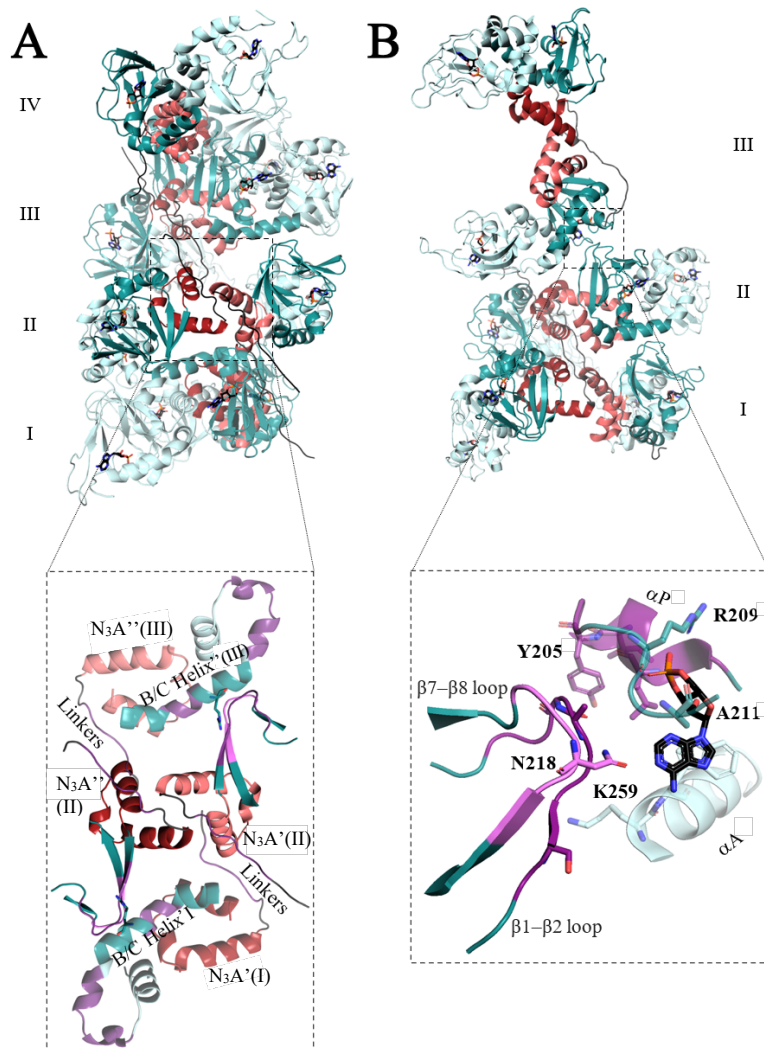

3

4 **Figure S5:** Comparative Analysis of RI $\alpha$  A211D vs. Wild Type cAMP-Bound Dimers. The  
 5 asymmetrical unit of cAMP-bound dimers of A211D RI $\alpha$  (1-379) (A) and wild type RI $\alpha$  (1-379)  
 6 symmetry mates (PDB code: 4MX3) (B). The unit cell of A211D packs in a R3 space group  
 7 comprised of four individual dimers (I-IV). In contrast, wild type packs in a P42<sub>1</sub>2<sub>1</sub>2 space group  
 8 composed of a single dimer, which we expanded along symmetry mates showing three dimers (I-  
 9 III). The domains are colored as follows: Linker (Black); N<sub>3</sub>A (Red or Salmon); CBD-A (Dark  
 10 Cyan); CBD-B (Light Cyan). The inset for panel (A) shows details of interface types 2a and 2b in  
 11 Table 1, including portions of the  $\beta$ 1- $\beta$ 2 loops of CBD-A interacting with the B/C Helix (i.e. A  
 12 helix of CBD-B). The inset for panel (B) illustrates details of interface 2c in Table 1, including  
 13 portions of the  $\beta$ 1- $\beta$ 2 loops of CBD-A in one dimer interacting with the  $\alpha$ P helix of CBD-B in  
 14 another dimer. Residues highlighted in shades of purple were identified by AGGRESCAN *in*  
 15 *silico*. Interestingly, the A211D mutant dimers pack along several regions identified *in silico* to  
 16 be prone to aggregation (Figure S3) (19).

# 1 Figure S6

2

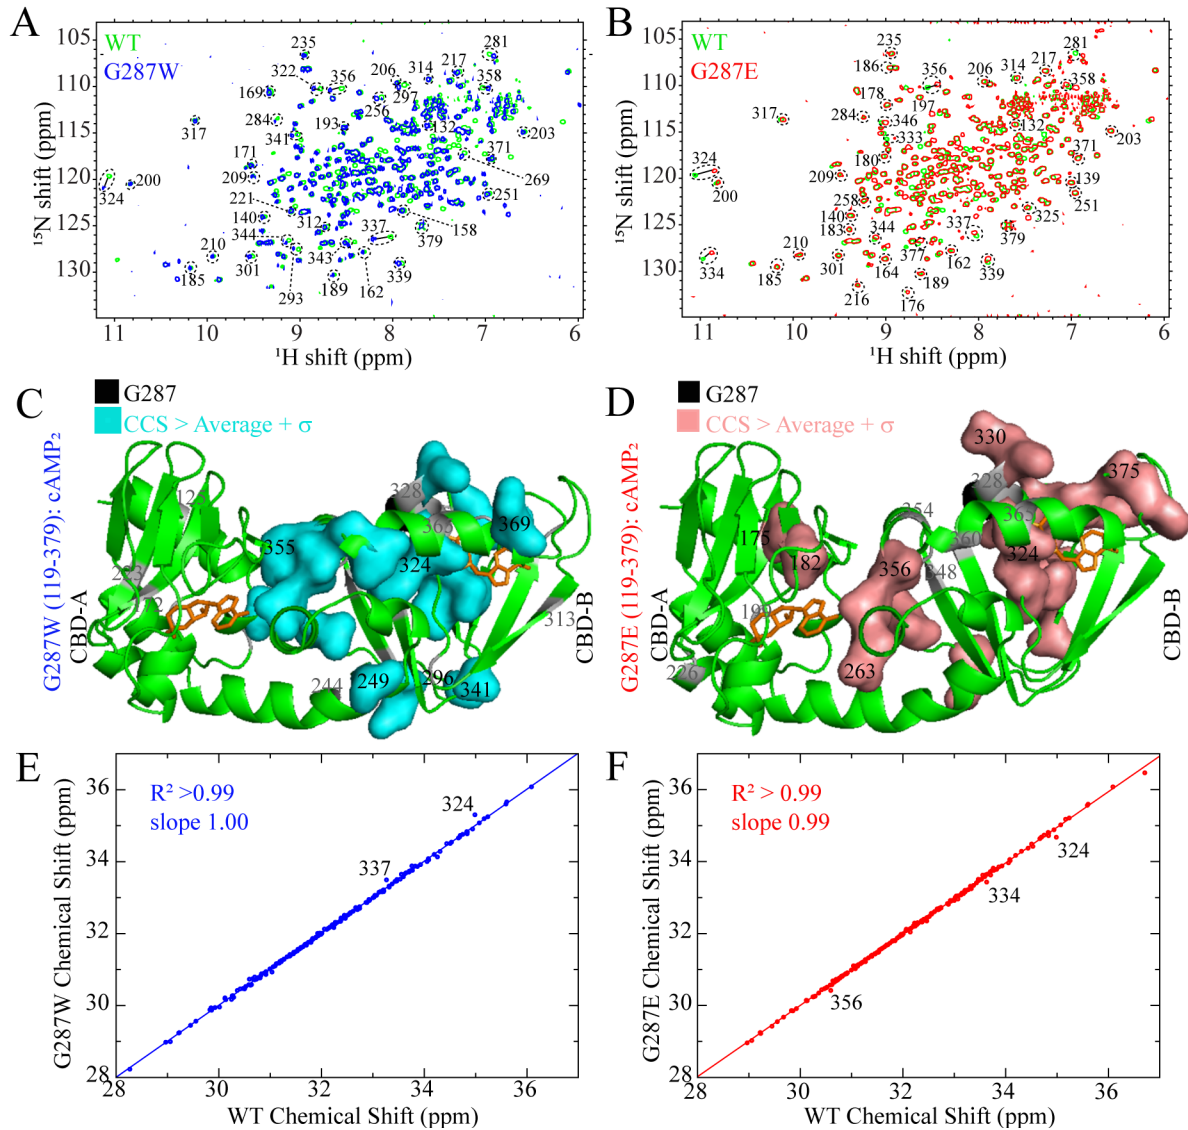

3

4

5 **Figure S6:** Chemical Shift Map of the Perturbations Caused by CNC and ACRDYS1 G287  
 6 Mutations on the PKA R1α Tandem CBDs. (A) Overlay of HSQCs spectra of G287W (blue) and  
 7 wt PKA R1α (119-379) (green) in the presence of 1.2 mM cAMP. (B) As A, but for the G287E  
 8 mutation. (C) Map of the residues with G287W-induced CCS changes greater than the average  
 9 plus one standard deviation on the structure of the tandem PKA R1α CBDs bound to cAMP (7).  
 10 Unassigned or broadened beyond detection residues are highlighted with a gray ribbon. (D) As C,  
 11 but for the G287E mutation. (E) Correlation between the compounded chemical shifts (CCS) of  
 12 G287W and wt PKA R1α (119-379) from the spectra in (A). (F) As E, but for the G287E mutation.

13

# Figure S7

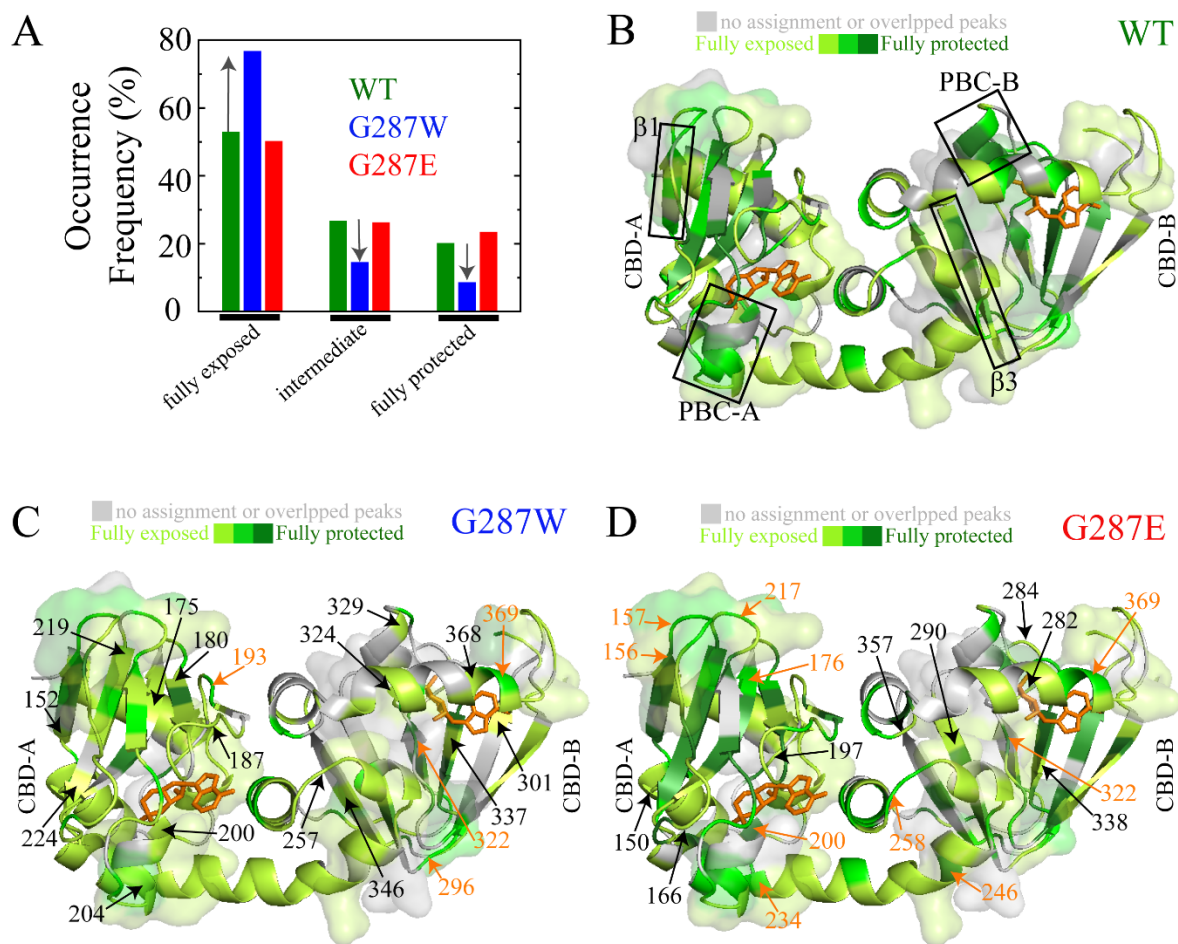

**Figure S7: HDX NMR Map of the Perturbations Caused by CNC and ACRDYS1 G287 Mutations on the PKA R1 $\alpha$  Tandem CBDs.** Residue-specific solvent exposure as gauged based on H/D exchange monitored by HSQC spectra for the PKA R1 $\alpha$  (119-379) construct in the presence of 0.7 mM excess cAMP. Residues are categorized in three groups as in Figure 2 and S2: fully exposed, intermediate, and fully protected. The cAMP-bound structure (7) is used for all HDX maps. Color codes are shown in the figure. (A) Frequency of occurrence for each exchange class based on the assigned residues. Vertical arrows show the G287W vs. wt frequency changes. (B) wt, as in Figure 2C, included here as well for the convenience of comparison. (C) G287W mutant. (D) G287E mutant. Black and orange arrows have the same meaning as in Figure 2. Surfaces in B-D highlight aggregation prone regions as identified by Aggregscan (Fig. S3A).

1  
2  
3  
4

## Figure S8

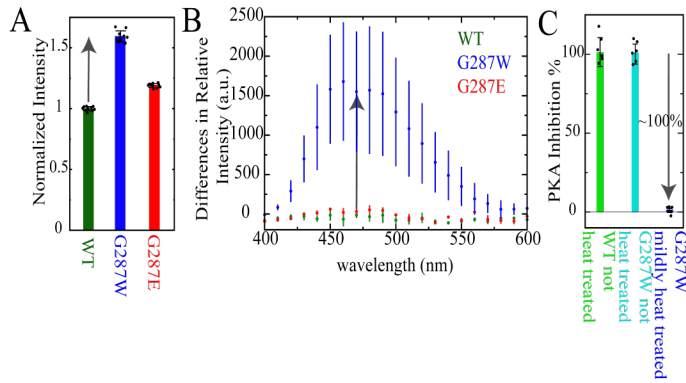

5  
6  
7  
8  
9  
10  
11  
12  
13  
14  
15  
16

**Figure S8: PKA C Activation by PKA G287W R1 $\alpha$  Aggregation.** (A) Normalized ThT fluorescence of 8  $\mu$ M wt, G287W and G287E PKA R1 $\alpha$  measured in the presence of 143  $\mu$ M cAMP after 13 hours and 20 minutes of incubation at 60  $^{\circ}$ C. It was ten data points and error is SD. (B) Heat treatment-induced ANS fluorescence intensity difference. Data acquired in duplicate and error is SD. (C) Maximum kinase inhibition by G287W PKA R1 $\alpha$  before (cyan) and after (blue) mild heat treatment of 1  $\mu$ M G287W PKA R1 $\alpha$  prior to dilution for the kinase assay. The UV absorbance at 280 nm indicates that the protein is still present in solution even after mild heat treatment, hence the loss of PKA inhibition occurring upon mild heat treatment is not simply the result of precipitation. The wt PKA R1 $\alpha$  inhibitory potency (green) is included as a positive control. Six data points and error is SD.

# 1 **Figure S9**

2

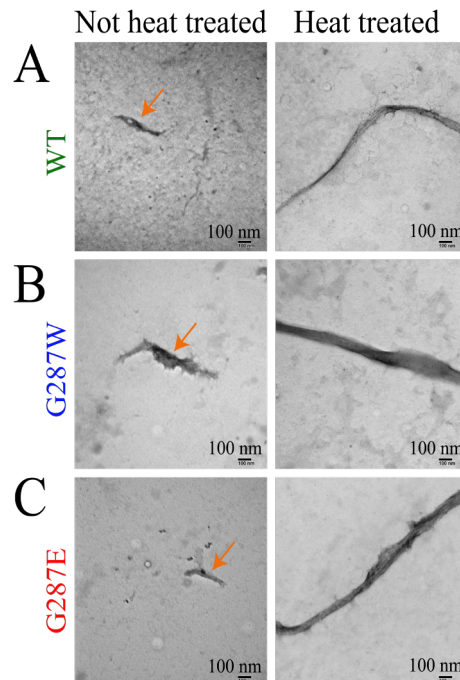

3

4

5 **Figure S9:** *Morphology of wt, G287W and G287E PKA R1 $\alpha$  Assemblies Before and After Heat*  
6 *Treatment.* TEM images of PKA R1 $\alpha$  in the presence of ten-fold excess cAMP before and after  
7 heat treatment. Horizontal 100 nm bars are indicated in each panel. PKA R1 $\alpha$  oligomers with sizes  
8 of the order of 100 nm are already present prior to heat treatment (orange arrows), indicating that  
9 the heat treatment accelerates oligomerization processes intrinsic to PKA R1 $\alpha$ . These observations  
10 apply to wt PKA R1 $\alpha$  as well as the two G287 mutants. The wt PKA R1 $\alpha$  sample used here is  
11 distinct from that in Figure S6, showing that aggregate formation is indeed reproducible.

12

13

1

**Table S1.** Estimation of A211 Mutants vs. WT PKA R1 $\alpha$  Stability ( $\Delta\Delta G$ )<sup>a</sup>

| State       | PDB Code Construct                 | Disease | Mutant | $\Delta\Delta G$ (kcal/mol) <sup>b</sup> | RMSD (Å) <sup>c</sup> |
|-------------|------------------------------------|---------|--------|------------------------------------------|-----------------------|
| cAMP bound  | 1RGS <sup>d</sup><br>91-379 (7)    | CNC     | A211D  | 2.04 <sup>g</sup>                        | 0.515                 |
|             |                                    | ACRDYS1 | A211T  | -10.50                                   | 0.661                 |
|             | 3PNA <sup>d</sup><br>91-244 (20)   | CNC     | A211D  | 3.77                                     | 0.232                 |
|             |                                    | ACRDYS1 | A211T  | 0.60                                     | 0.230                 |
| C-sub bound | 6NO7 <sup>e, f</sup><br>1-379 (21) | CNC     | A211D  | 1.12                                     | 1.310                 |
|             |                                    | ACRDYS1 | A211T  | -2.77                                    | 1.189                 |
|             | 2QCS <sup>f</sup><br>91-379 (22)   | CNC     | A211D  | > 10                                     | 0.357                 |
|             |                                    | ACRDYS1 | A211T  | 5.33                                     | 0.507                 |

<sup>a</sup> Based on the ERIS software implemented with flexible backbone and pre-relaxation.<sup>(23)</sup> <sup>b</sup> Positive (negative)  $\Delta\Delta G$  (kcal/ mol) values indicate that the mutant destabilizes (stabilizes) the structure. <sup>c</sup> The RMSD of the predicted structure compared to the initial WT structure. <sup>d</sup> The cAMP ligands were removed from the PDB file before submission to ERIS. <sup>e</sup> One R1 $\alpha$  protomer was removed from the PDB file utilized as ERIS input. <sup>f</sup> The C-subunit was removed from the PDB file used as ERIS input. <sup>g</sup> This value increases to 7.98 kcal/mol for the 1-379 construct in the 4MX3 structure.

2

3

4

1

**Table S2. Data Collection and Refinement Statistics of the A211D PKA R1 $\alpha$  (1-379) Crystal Structure**

| RI $\alpha$ A211D                                       |              |
|---------------------------------------------------------|--------------|
| <b>Data collection</b>                                  |              |
| Space group                                             | R3           |
| Cell dimensions (Å)                                     |              |
| <i>a=b</i>                                              | 176.8        |
| <i>c</i>                                                | 345.5        |
| No. of dimers per asymmetrical unit                     | 4            |
| Resolution (Å)                                          | 4.15         |
| <i>R</i> <sub>merge</sub>                               | 0.18 (0.46)  |
| Completeness (%)                                        | 99.3 (100.0) |
| I/sigma                                                 | 12.8 (1.9)   |
| No. reflections                                         | 30356        |
| <b>Refinement</b>                                       |              |
| Resolution (Å)                                          | 50.0-4.15    |
| <i>R</i> <sub>work</sub> / <i>R</i> <sub>free</sub> (%) | 22.1/27.0    |
| R.m.s. deviations                                       |              |
| Bond lengths (Å)                                        | 0.029        |
| Bond angles (°)                                         | 3.2          |
| Ramachandran angles (%)                                 |              |
| most favored                                            | 83.4         |
| disallowed                                              | None         |

2

3

4

**Table S3. A211D vs. WT PKA R1 $\alpha$  RMSD Values <sup>a</sup>**

|             | residues | Single Protomers <sup>b</sup>       | Dimers <sup>c</sup>                 |
|-------------|----------|-------------------------------------|-------------------------------------|
|             |          | <RMSD> ± $\sigma_{\text{RMSD}}$ (Å) | <RMSD> ± $\sigma_{\text{RMSD}}$ (Å) |
| R1 $\alpha$ | 109-376  | 0.8 ± 0.1 <sup>d</sup>              | 1.6 ± 0.7                           |
| CBD-A       | 109-244  | 0.6 ± 0.1 <sup>d</sup>              | 1.1 ± 0.3                           |
| CBD-B       | 245-376  | 1.0 ± 0.1                           | 1.8 ± 1.0                           |

<sup>a</sup> For WT PKA R1 $\alpha$  (1-379) the PDB: 4MX3 was used (24). All RMSD values are for backbone atoms. <sup>b</sup> Average over 16 A211D-WT protomer pairs. <sup>c</sup> Average over four A211D dimers. <sup>d</sup> Standard deviation < 0.1.

5

6



1  
2  
3  
4  
5  
6  
7**Table S4.** Estimation of G287 Mutants vs. WT PKA R1 $\alpha$  Stability ( $\Delta\Delta G$ )<sup>a</sup>

| State       | PDB and construct                   | Disease | Mutant | $\Delta\Delta G$ (kcal/mol) <sup>b</sup> | RMSD ( $\text{\AA}$ ) <sup>c</sup> |
|-------------|-------------------------------------|---------|--------|------------------------------------------|------------------------------------|
| cAMP bound  | 4MX3 <sup>d</sup><br>1-379 (24)     | CNC     | G287W  | > 10                                     | 0.945                              |
|             |                                     | ACRDYS1 | G287E  | 6.98                                     | 1.114                              |
|             | 1RGS <sup>d</sup><br>91-379 (7)     | CNC     | G287W  | > 10                                     | 0.528                              |
|             |                                     | ACRDYS1 | G287E  | 0.81                                     | 0.535                              |
| C-sub bound | 6NO7 <sup>e,f</sup><br>1-379 (21)   | CNC     | G287W  | > 10                                     | 1.299                              |
|             |                                     | ACRDYS1 | G287E  | -3.47                                    | 1.230                              |
|             | 2QCS <sup>f</sup><br>91-379<br>(22) | CNC     | G287W  | > 10                                     | 0.589                              |
|             |                                     | ACRDYS1 | G287E  | -3.30                                    | 0.725                              |

<sup>a</sup>Based on the ERIS software implemented with flexible backbone and pre-relaxation.(23) <sup>b</sup>Positive (negative)  $\Delta\Delta G$  (kcal/ mol) values indicate that the mutant destabilizes (stabilizes) the structure. <sup>c</sup>The RMSD of the predicted structure compared to the initial WT structure. <sup>d</sup>The cAMP ligands were removed from the PDB file before submission to ERIS. <sup>e</sup>One R1 $\alpha$  protomer was removed from the PDB file utilized as ERIS input. <sup>f</sup>The C-subunit was removed from the PDB file used as ERIS input.

8  
9  
10  
11  
12

## Supplementary References

1. R. Das, *et al.*, Dynamically driven ligand selectivity in cyclic nucleotide binding domains. *J. Biol. Chem.* **284**, 23682–23696 (2009).
2. E. T. McNicholl, R. Das, S. SilDas, S. S. Taylor, G. Melacini, Communication between tandem cAMP binding domains in the regulatory subunit of protein kinase A- $\alpha$  as revealed by domain-silencing mutations. *J. Biol. Chem.* **285**, 15523–15537 (2010).
3. M. Akimoto, *et al.*, Signaling through dynamic linkers as revealed by PKA. *Proc. Natl. Acad. Sci.* **110**, 14231–14236 (2013).
4. K. J. Moleschi, M. Akimoto, G. Melacini, Measurement of state-specific association constants in allosteric sensors through molecular stapling and NMR. *J. Am. Chem. Soc.* **137**, 10777–10785 (2015).
5. M. Akimoto, *et al.*, Mapping the free energy landscape of PKA inhibition and activation: A double-conformational selection model for the tandem cAMP-binding domains of PKA R1 $\alpha$ . *PLoS Biol.* **13**, e1002305 (2015).
6. Z. Otwinowski, W. Minor, Processing of X-ray diffraction data collected in oscillation mode. *Methods Enzymol.* **276**, 307–26 (1997).
7. Y. Su, *et al.*, Regulatory subunit of protein kinase A: structure of deletion mutant with cAMP binding domains. *Science (80- )*. **269**, 807–813 (1995).
8. L. C. Storoni, A. J. McCoy, R. J. Read, Likelihood-enhanced fast rotation functions. *Acta Crystallogr. Sect. D Biol. Crystallogr.* **60**, 432–438 (2004).
9. K. Cowtan, Recent developments in classical density modification. *Acta Crystallogr. Sect. D Biol. Crystallogr.* **66**, 470–478 (2010).
10. G. F. Schröder, M. Levitt, A. T. Brunger, Super-resolution biomolecular crystallography with low-resolution data. *Nature* **464**, 1218–1222 (2010).
11. P. Emsley, K. Cowtan, Coot: model-building tools for molecular graphics. *Acta Crystallogr. Sect. D Biol. Crystallogr.* **60**, 2126–2132 (2004).
12. A. T. Brunger, Version 1.2 of the Crystallography and NMR system. *Nat. Protoc.* **2**, 2728 (2007).
13. M. D. Winn, *et al.*, Overview of the CCP 4 suite and current developments. *Acta Crystallogr. Sect. D Biol. Crystallogr.* **67**, 235–242 (2011).
14. M. D. Winn, M. N. Isupov, G. N. Murshudov, Use of TLS parameters to model anisotropic displacements in macromolecular refinement. *Acta Crystallogr. D. Biol. Crystallogr.* **57**, 122–33 (2001).
15. R. A. Laskowski, M. W. MacArthur, D. S. Moss, J. M. Thornton, PROCHECK: a program to check the stereochemical quality of protein structures. *J. Appl. Crystallogr.* **26**, 283–291 (1993).
16. E. Krissinel, K. Henrick, Inference of macromolecular assemblies from crystalline state. *J. Mol. Biol.* **372**, 774–797 (2007).
17. O. Conchillo-Solé, *et al.*, AGGRESCAN: a server for the prediction and evaluation of "hot spots" of aggregation in polypeptides. *BMC Bioinformatics* **8**, 65 (2007).
18. K. K. Frousios, V. A. Iconomidou, C.-M. Karletidi, S. J. Hamodrakas, Amyloidogenic determinants are usually not buried. *BMC Struct. Biol.* **9**, 44 (2009).
19. K. K. Dao, *et al.*, The regulatory subunit of PKA-I remains partially structured and undergoes  $\beta$ -aggregation upon thermal denaturation. *PLoS One* **6**, e17602 (2011).
20. S. Badireddy, *et al.*, Cyclic AMP analog blocks kinase activation by stabilizing inactive

- 1 conformation: conformational selection highlights a new concept in allosteric inhibitor  
2 design. *Mol. Cell. Proteomics* **10** (2011).
- 3 21. T.-W. Lu, *et al.*, Two PKA RI $\alpha$  holoenzyme states define ATP as an isoform-specific  
4 orthosteric inhibitor that competes with the allosteric activator, cAMP. *Proc. Natl. Acad.*  
5 *Sci.* **116**, 16347–16356 (2019).
- 6 22. C. Kim, C. Y. Cheng, S. A. Saldanha, S. S. Taylor, PKA-I holoenzyme structure reveals a  
7 mechanism for cAMP-dependent activation. *Cell* **130**, 1032–1043 (2007).
- 8 23. S. Yin, F. Ding, N. V Dokholyan, Eris: an automated estimator of protein stability. *Nat.*  
9 *Methods* **4**, 466–467 (2007).
- 10 24. J. G. H. Bruystens, *et al.*, PKA RI $\alpha$  homodimer structure reveals an intermolecular  
11 interface with implications for cooperative cAMP binding and Carney complex disease.  
12 *Structure* **22**, 59–69 (2014).
- 13
